# Supplementary material
Source: Springer Nature journal article supplement (https://www.springermedizin.de/resource/supplementary/12890_2012_396_MOESM1_ESM.pdf/9505104)

**A**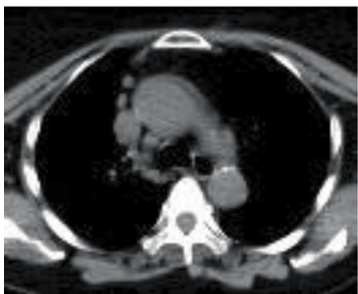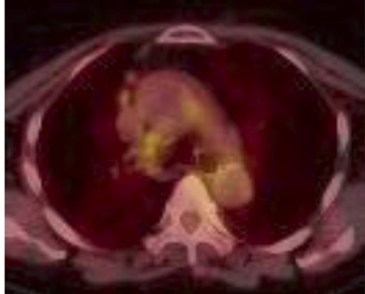**B**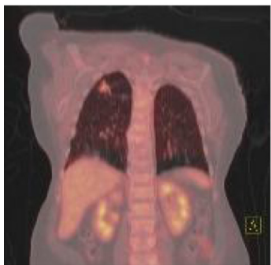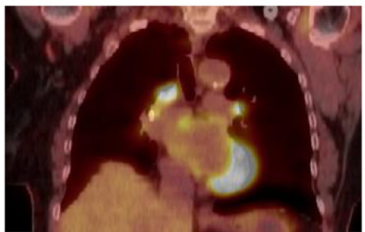**C**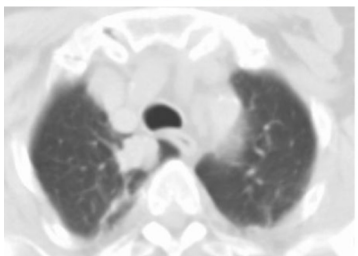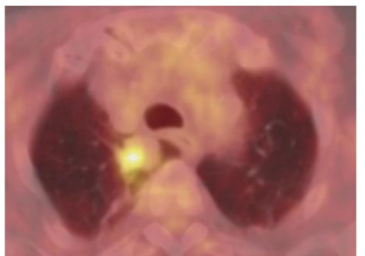

Supplement: MOESM1 [file 9505104]
